# Supplementary material for: First Report of Isolation and Molecular Characterization of Felid Herpesvirus-1 from Symptomatic Domestic Cats in Egypt
Source: MDPI journal article supplement (doi:10.3390/vetsci9020081), 2022-02-15
Supplement: s1 [file s1]

## Supporting Material

### First report of Isolation and Molecular Characterization of Felid Herpesvirus-1 from Symptomatic Domestic Cats in Egypt

Asmaa Magouz <sup>1\*</sup>, Maha S. Lokman <sup>2,3</sup>, Ashraf Albrakati <sup>3</sup>, and Ehab Kotb Elmahallawy <sup>4\*</sup>

**Table S1.** The full details of the study cohort for each of the enrolled cat's sex, age, breed, sample source, clinical signs, vaccination status and number of samples.

| Breed               | Age<br>(months) | Sex    | Sample source      | Clinical signs | Vaccination<br>status | Number of<br>samples |
|---------------------|-----------------|--------|--------------------|----------------|-----------------------|----------------------|
| Persian             | 6               | Female | Conjunctival swab  | Conjunctivitis | vaccinated            | 4                    |
| himalaya            |                 |        |                    |                |                       |                      |
| Persian             | 5               | Female | Oropharyngeal swab | URTD           | vaccinated            | 4                    |
| himalaya            |                 |        |                    |                |                       |                      |
| Persian (moon face) | 9               | Female | Oropharyngeal swab | URTD           | vaccinated            | 4                    |
| Persian (moon face) | 3               | Male   | Conjunctival swab  | Corneal ulcer  | unknown               | 4                    |
| Mix breed           | 12              | Male   | Conjunctival swab  | Conjunctivitis | vaccinated            | 4                    |
| Mix breed           | 6               | Female | Oropharyngeal swab | URTD           | vaccinated            | 4                    |
| Mix breed           | 4               | Male   | Oropharyngeal swab | URTD           | vaccinated            | 4                    |
| Persian (moon face) | 6               | Male   | Oropharyngeal swab | URTD           | vaccinated            | 4                    |
| Mix breed           | 3               | Female | Oropharyngeal swab | URTD           | Unknown               | 4                    |
| Mix breed           | 9               | Male   | Conjunctival swab  | Conjunctivitis | vaccinated            | 4                    |
| Persian             | 2               | Female | Oropharyngeal swab | URTD           | Not vaccinated        | 4                    |
| himalaya            |                 |        |                    |                |                       |                      |
| Persian (moon face) | 15              | Male   | Oropharyngeal swab | URTD           | vaccinated            | 4                    |
| Mix breed           | 7               | Female | Conjunctival swab  | Corneal ulcer  | vaccinated            | 4                    |
| Persian             | 3               | Female | Oropharyngeal swab | URTD           | vaccinated            | 4                    |
| himalaya            |                 |        |                    |                |                       |                      |
| Mix breed           | 3               | Female | Conjunctival swab  | Conjunctivitis | Not vaccinated        | 4                    |
| Mix breed           | 2               | Male   | Oropharyngeal swab | URTD           | vaccinated            | 4                    |
| Mix breed           | 4               | Female | Oropharyngeal swab | URTD           | vaccinated            | 4                    |
| Persian (moon face) | 3               | Female | Conjunctival swab  | Conjunctivitis | vaccinated            | 4                    |

|                     |    |        |                    |                |                |   |
|---------------------|----|--------|--------------------|----------------|----------------|---|
| Mix breed           | 12 | Male   | Oropharyngeal swab | Corneal ulcer  | vaccinated     | 4 |
| Persian himalaya    | 18 | Female | Conjunctival swab  | Conjunctivitis | Unknown        | 4 |
| Persian peki        | 6  | Male   | Oropharyngeal swab | URTD           | vaccinated     | 4 |
| Mix breed           | 5  | Female | Oropharyngeal swab | URTD           | vaccinated     | 4 |
| Mix breed           | 9  | Female | Conjunctival swab  | Corneal ulcer  | vaccinated     | 4 |
| Persian peki        | 3  | Male   | Oropharyngeal swab | URTD           | Not vaccinated | 4 |
| Persian himalaya    | 4  | Male   | Conjunctival swab  | Conjunctivitis | vaccinated     | 4 |
| Persian himalaya    | 4  | Female | Conjunctival swab  | Conjunctivitis | vaccinated     | 4 |
| Persian peki        | 15 | Male   | Oropharyngeal swab | URTD           | vaccinated     | 4 |
| Mix breed           | 2  | Male   | Oropharyngeal swab | URTD           | Not vaccinated | 4 |
| Mix breed           | 18 | Male   | Oropharyngeal swab | URTD           | vaccinated     | 4 |
| Persian peki        | 2  | Female | Oropharyngeal swab | URTD           | Not vaccinated | 4 |
| Mix breed           | 3  | Male   | Oropharyngeal swab | URTD           | vaccinated     | 4 |
| Persian peki        | 12 | Male   | Conjunctival swab  | Conjunctivitis | unknown        | 4 |
| Persian (moon face) | 4  | Female | Conjunctival swab  | Corneal ulcer  | vaccinated     | 4 |
| Mix breed           | 6  | Male   | Conjunctival swab  | Conjunctivitis | vaccinated     | 4 |
| Persian himalaya    | 7  | Male   | Conjunctival swab  | Conjunctivitis | vaccinated     | 4 |
